# Supplementary material for: Exome Evaluation of Autism-Associated Genes in Amazon American Populations
Source: MDPI journal article supplement (doi:10.3390/genes13020368), 2022-02-18
Supplement: s1 [file s1]

**SUPPLEMENTARY TABLE S1 - DESCRIPTION OF ALL VARIANTS OF THE 5  
GENES ANALYZED IN AMERINDIAN INDIVIDUALS (IND).**

| Gene    | SNP ID       | Region   | Nucleotide<br>change | Impact   | IND        | AFR  | AMR  | EAS  | EUR  | SAS  |
|---------|--------------|----------|----------------------|----------|------------|------|------|------|------|------|
| FOXP1   | rs1435680522 | 3UTR     | GT>G                 | MODIFIER | 0          | -    | -    | -    | -    | -    |
| FOXP1   | rs112773801  | 3UTR     | G>GT                 | MODIFIER | 0,01666667 | 0,42 | 0,19 | 0,45 | 0,13 | 0,33 |
| FOXP1   | rs9855825    | intronic | A>T                  | MODIFIER | -          | 0,44 | 0,66 | 0,85 | 0,68 | 0,55 |
| FOXP1   | rs58847217   | intronic | T>C                  | MODIFIER | 0,02777778 | 0,1  | 0    | 0    | 0    | 0    |
| FOXP1   | rs76145927   | CDS      | T>C                  | MODERATE | 0          | 0    | 0,01 | 0,04 | 0    | 0    |
| FOXP1   | rs760260048  | CDS      | G>A                  | LOW      | 0,00862069 | 0    | 0    | 0    | 0    | 0    |
| FOXP1   | rs72960080   | intronic | T>C                  | MODIFIER | 0,08333333 | 0,12 | 0    | 0    | 0    | 0    |
| FOXP1   | rs13068094   | intronic | C>T                  | MODIFIER | 0,08333333 | 0,1  | 0,54 | 0,06 | 0,58 | 0,28 |
| FOXP1   | rs17008224   | intronic | G>A                  | MODIFIER | -          | 0    | 0,03 | 0,2  | 0,02 | 0,05 |
| FOXP1   | rs7638391    | intronic | G>T                  | MODIFIER | 1          | 1    | 0,97 | 1    | 0,92 | 0,98 |
| FOXP1   | rs56850311   | intronic | A>T                  | MODIFIER | 0          | 0,4  | 0,25 | 0,11 | 0,29 | 0,22 |
| FOXP1   | rs1295692908 | CDS      | A>T                  | MODERATE | 0,08333333 | 0    | 0    | 0    | 0    | 0    |
| FOXP1   | rs7639736    | intronic | C>A                  | MODIFIER | 0          | 0,08 | 0,06 | 0,07 | 0,01 | 0,02 |
| FOXP1   | rs939845     | intronic | A>G                  | MODIFIER | 0,3984375  | 0,16 | 0,23 | 0,11 | 0,06 | 0,04 |
| FOXP1   | rs2037474    | intronic | A>G                  | MODIFIER | 0,515625   | 0,27 | 0,34 | 0,44 | 0,14 | 0,25 |
| FOXP1   | rs747208306  | intronic | G>A                  | MODIFIER | 0,0952381  | 0    | 0    | 0    | 0    | 0    |
| FOXP1   | rs151011253  | intronic | T>TA                 | MODIFIER | 0,01388889 | -    | -    | -    | -    | -    |
| SYNGAP1 | rs76557362   | intronic | C>T                  | MODIFIER | 0,08333333 | 0,25 | 0,01 | 0    | 0    | 0    |
| SYNGAP1 | rs1245444837 | intronic | C>CA                 | MODIFIER | -          | -    | -    | -    | -    | -    |
| SYNGAP1 | rs453590     | intronic | C>T                  | MODIFIER | 0          | 0,27 | 0,41 | 0,64 | 0,39 | 0,54 |
| SYNGAP1 | rs115441992  | intronic | C>T                  | MODIFIER | 0,08333333 | 0,01 | 0,01 | 0    | 0,01 | 0    |
| SYNGAP1 | rs544817923  | CDS      | A>G                  | LOW      | 0,0703125  | 0    | 0    | 0    | 0    | 0    |
| SYNGAP1 | rs411136     | CDS      | G>A                  | LOW      | 0,375      | 0,27 | 0,4  | 0,63 | 0,38 | 0,54 |
| SYNGAP1 | .            | CDS      | C>G                  | MODERATE | 0          | -    | -    | -    | -    | -    |
| SYNGAP1 | rs9394145    | intronic | C>T                  | MODIFIER | 0,5078125  | 0,01 | 0,32 | 0,25 | 0,32 | 0,32 |
| SYNGAP1 | rs138475712  | intronic | TTC>T                | MODIFIER | 0          | -    | -    | -    | -    | -    |
| CHD8    | rs8022395    | CDS      | C>T                  | LOW      | 0,640625   | 0,95 | 0,81 | 0,89 | 0,93 | 0,92 |
| CHD8    | rs35057134   | intronic | GA>G                 | MODIFIER | 0,01428571 | 0,23 | 0,21 | 0,35 | 0,27 | 0,26 |
| CHD8    | rs201856289  | CDS      | A>T                  | LOW      | 0,08333333 | 0    | 0    | 0    | 0    | 0    |
| CHD8    | rs80311097   | intronic | C>A                  | MODIFIER | 0          | 0,06 | 0    | 0    | 0    | 0    |
| CHD8    | rs1021755285 | intronic | A>G                  | MODIFIER | 0          | -    | -    | -    | -    | -    |
| CHD8    | rs931605748  | CDS      | T>C                  | LOW      | 0          | 0    | 0    | 0    | 0    | 0    |
| CHD8    | rs992446349  | CDS      | G>A                  | LOW      | 0          | 0    | 0    | 0    | 0    | 0    |
| CHD8    | rs10467770   | CDS      | C>T                  | MODERATE | 0,078125   | 0,22 | 0,19 | 0,35 | 0,25 | 0,25 |
| CHD8    | rs111250264  | CDS      | G>A                  | MODERATE | 0,00862069 | 0,01 | 0    | 0    | 0    | 0    |
| CHD8    | rs57764234   | intronic | C>T                  | MODIFIER | 0,02459016 | 0,32 | 0,03 | 0    | 0,02 | 0,01 |

|       |              |          |          |          |            |      |      |      |      |      |
|-------|--------------|----------|----------|----------|------------|------|------|------|------|------|
| CHD8  | .            | intronic | AAATGT>A | MODIFIER | 0          | -    | -    | -    | -    | -    |
| CHD8  | rs111776414  | intronic | G>GA     | MODIFIER | 0,04166667 | 0,16 | 0,01 | 0    | 0    | 0,01 |
| CHD8  | rs1998332    | intronic | G>A      | MODIFIER | 0,6171875  | 0,57 | 0,78 | 0,89 | 0,91 | 0,92 |
| CHD8  | rs113076568  | intronic | C>CT     | MODIFIER | 0,11904762 | 0    | 0,76 | 0,87 | 0,87 | 0,01 |
| CHD8  | rs929799421  | CDS      | C>G      | MODERATE | 0,01724138 | 0    | 0    | 0    | 0    | 0    |
| CHD8  | rs149307240  | CDS      | C>T      | MODERATE | 0,02586207 | 0    | 0,02 | 0    | 0    | 0    |
| SCN2A | rs17183814   | CDS      | G>A      | MODERATE | 0,25       | 0,02 | 0,08 | 0,14 | 0,06 | 0,14 |
| SCN2A | rs1864885    | intronic | A>G      | MODIFIER | -          | 0,03 | 0,3  | 0,34 | 0,25 | 0,19 |
| SCN2A | rs2060198    | CDS      | T>A      | LOW      | 0          | 0,16 | 0,25 | 0,25 | 0,29 | 0,33 |
| SCN2A | rs75109281   | intronic | C>T      | MODIFIER | 0,08333333 | 0,01 | 0    | 0    | 0    | 0    |
| SCN2A | rs3769951    | intronic | C>T      | MODIFIER | 0,01351351 | 0,16 | 0,25 | 0,26 | 0,29 | 0,33 |
| SCN2A | rs28472553   | intronic | A>C      | MODIFIER | 0,08333333 | 0,03 | 0    | 0    | 0    | 0    |
| SCN2A | rs3835933    | intronic | TG>T     | MODIFIER | 0,22222222 | -    | -    | -    | -    | -    |
| SCN2A | rs145662546  | CDS      | C>T      | LOW      | 0,08333333 | 0,01 | 0,01 | 0    | 0    | 0    |
| SCN2A | rs139906774  | intronic | G>GA     | MODIFIER | 0          | 0,05 | 0,3  | 0,34 | 0,24 | 0,19 |
| SCN2A | rs2304014    | intronic | T>A      | MODIFIER | 0,02702703 | 0,23 | 0,13 | 0,14 | 0,18 | 0,14 |
| SCN2A | rs6432821    | intronic | T>C      | MODIFIER | 1          | 0,95 | 1    | 1    | 1    | 1    |
| SCN2A | rs150453735  | intronic | C>T      | MODIFIER | 0,18518519 | 0    | 0,05 | 0    | 0    | 0    |
| SCN2A | rs1867864    | intronic | C>T      | MODIFIER | 0,4453125  | 0,61 | 0,46 | 0,34 | 0,56 | 0,49 |
| SCN2A | rs1838846    | intronic | A>G      | MODIFIER | 0          | 0,79 | 0,79 | 0,74 | 0,83 | 0,7  |
| SCN2A | rs1361108483 | intronic | A>G      | MODIFIER | 0          | -    | -    | -    | -    | -    |
| SCN2A | rs2121371    | OTHER    | T>C      | LOW      | 0          | 0,79 | 0,79 | 0,74 | 0,83 | 0,7  |
| SCN2A | rs7593568    | intronic | A>G      | MODIFIER | 0          | 0,8  | 0,8  | 0,74 | 0,83 | 0,7  |

**SUPPLEMENTARY TABLE S2 – PAIRWISE FTS BETWEEN THE AMERINDIANS (IND) AND THE FIVE CONTINENTAL POPULATIONS OF THE 1000 GENOMAS DATABASE.**

|     | IND     | AFR     | AMR     | EAS     | EUR     | SAS     |
|-----|---------|---------|---------|---------|---------|---------|
| IND | 0.00000 |         |         |         |         |         |
| AFR | 0.03729 | 0.00000 |         |         |         |         |
| AMR | 0.07114 | 0.07615 | 0.00000 |         |         |         |
| EAS | 0.00219 | 0.08752 | 0.05710 | 0.00000 |         |         |
| EUR | 0.01505 | 0.09089 | 0.01324 | 0.07895 | 0.00000 |         |
| SAS | 0.01693 | 0.07190 | 0.04242 | 0.02395 | 0.04951 | 0.00000 |
